# Supplementary material for: Genome-Wide Analysis of the DNA Methylation Profile Identifies the fragile histidine triad (FHIT) Gene as a New Promising Biomarker of Crohn’s Disease
Source: PubMed Central journal article supplement (PMC7291297; doi:10.3390/jcm9051338), 2020-05-04

**Supplemental Table S1. List of differentially methylated CpG sites**

| DMRs  | cgid       | chr   | start     | end       | gene     | nmid         | annot          | cpg      | prom     | pval     | adj. pval   | FC_avg      | nc_avg      | cd_avg      |
|-------|------------|-------|-----------|-----------|----------|--------------|----------------|----------|----------|----------|-------------|-------------|-------------|-------------|
| Hyper | cg12827637 | chr14 | 69256790  | 69256791  | ZFP36L1  | NM_004926    | Body           | Island   | .        | 5.76E-05 | 0.000989714 | 4.465355492 | 0.06419878  | 0.287016909 |
| Hyper | cg02072495 | chr15 | 60689284  | 60689285  | ANXA2    | NM_001136015 | 5'UTR          | N_Shore  | .        | 2.04E-05 | 0.000560282 | 3.808196653 | 0.056572464 | 0.215719887 |
| Hyper | cg26147845 | chr12 | 132433837 | 132433838 | EP400    | NM_015409    | TSS150(N_Shore | Promoter | .        | 3.92E-06 | 0.000301217 | 3.643351981 | 0.077868629 | 0.283967159 |
| Hyper | cg23737061 | chr3  | 60226327  | 60226328  | FHIT     | NM_001166243 | Body           | .        | .        | 1.65E-07 | 0.000239667 | 3.616168212 | 0.093920309 | 0.339893251 |
| Hyper | cg18215449 | chr12 | 66089472  | 66089473  | .        | .            | .              | .        | .        | 4.22E-07 | 0.000239667 | 3.565225234 | 0.064067475 | 0.228671502 |
| Hyper | cg24082121 | chr5  | 672871    | 672872    | TPPP     | NM_007030    | Body           | .        | .        | 1.78E-05 | 0.000525064 | 3.505843071 | 0.089095718 | 0.312606189 |
| Hyper | cg23032421 | chr3  | 3152037   | 3152038   | IL5RA    | NM_175727    | 5'UTR          | .        | .        | 1.04E-05 | 0.00041338  | 3.371418731 | 0.114213604 | 0.385299026 |
| Hyper | cg11737172 | chr8  | 1923051   | 1923052   | KBTBD11  | NM_014867    | 5'UTR          | S_Shore  | .        | 1.38E-05 | 0.000466865 | 3.368483202 | 0.108495063 | 0.365700645 |
| Hyper | cg16886175 | chr7  | 114562062 | 114562063 | MDFIC    | NM_001166345 | TSS200         | N_Shore  | Promoter | 7.28E-07 | 0.000243374 | 3.35638256  | 0.101463003 | 0.340784291 |
| Hyper | cg10986412 | chr5  | 672909    | 672910    | TPPP     | NM_007030    | Body           | .        | .        | 1.56E-06 | 0.000255546 | 3.316242102 | 0.071981379 | 0.238939304 |
| Hyper | cg02025737 | chr15 | 33384750  | 33384751  | .        | .            | .              | .        | .        | 3.80E-05 | 0.000776402 | 3.312390381 | 0.13643852  | 0.452168879 |
| Hyper | cg06243675 | chr8  | 11801364  | 11801365  | .        | .            | .              | .        | .        | 5.23E-05 | 0.000932639 | 3.254014485 | 0.016251643 | 0.053108482 |
| Hyper | cg09577804 | chr10 | 3235531   | 3235532   | .        | .            | .              | .        | .        | 5.04E-05 | 0.000912242 | 3.247042327 | 0.043496295 | 0.141459016 |
| Hyper | cg23057220 | chr19 | 1356314   | 1356315   | MUM1     | NR_024247    | TSS200         | S_Shore  | Promoter | 3.65E-05 | 0.000758178 | 3.204370027 | 0.14549078  | 0.466426732 |
| Hyper | cg06984883 | chr1  | 1243563   | 1243564   | PUSL1    | NM_153339    | TSS150(I       | Island   | Promoter | 5.07E-06 | 0.000323878 | 3.198831858 | 0.005047892 | 0.01636724  |
| Hyper | cg15963463 | chr1  | 25253236  | 25253237  | RUNX3    | NM_001031680 | Body           | N_Shelf  | .        | 5.64E-05 | 0.000977514 | 3.18669621  | 0.078493204 | 0.250352667 |
| Hyper | cg06653052 | chr19 | 1275166   | 1275167   | C19orf24 | NM_017914    | TSS150(I       | Island   | Promoter | 3.34E-06 | 0.000290989 | 3.184250672 | 0.048706609 | 0.155312479 |
| Hyper | cg09511741 | chr19 | 49668728  | 49668729  | TRPM4    | NM_017636    | Body           | N_Shore  | .        | 2.38E-05 | 0.000605015 | 3.165186894 | 0.191718252 | 0.607040616 |
| Hyper | cg03707168 | chr19 | 49379126  | 49379127  | PPP1R15A | NM_014330    | Body           | S_Shelf  | .        | 1.40E-05 | 0.000469682 | 3.157743559 | 0.071363261 | 0.225562653 |
| Hyper | cg08255475 | chr16 | 88871328  | 88871329  | CDT1     | NM_030928    | Body           | N_Shore  | .        | 4.16E-06 | 0.000305647 | 3.100866245 | 0.103590812 | 0.32143134  |
| Hyper | cg08591265 | chr17 | 56082866  | 56082867  | SFRS1    | NM_001078166 | 3'UTR          | N_Shore  | .        | 3.33E-05 | 0.000719045 | 3.094495159 | 0.119656568 | 0.370486121 |
| Hyper | cg10835083 | chr2  | 222395100 | 222395101 | EPHA4    | NM_004438    | Body           | .        | .        | 2.78E-05 | 0.000654934 | 3.037205824 | 0.128047198 | 0.389109418 |
| Hyper | cg23422156 | chr12 | 113587512 | 113587513 | CCDC42B  | NM_001144872 | TSS200         | N_Shelf  | Promoter | 1.80E-05 | 0.000527415 | 3.034134451 | 0.059533407 | 0.180835773 |
| Hyper | cg12946660 | chr19 | 41771872  | 41771873  | HNRNPUL1 | NM_007040    | Body           | S_Shore  | .        | 5.57E-06 | 0.00033242  | 3.004275681 | 0.069969937 | 0.210409408 |
| hypo  | cg26994377 | chr4  | 140579068 | 140579069 | .        | .            | .              | .        | .        | 2.29E-05 | 0.000594729 | 0.33304523  | 0.437705704 | 0.145709102 |
| hypo  | cg07068735 | chr15 | 63504870  | 63504871  | RAB8B    | NM_016530    | Body           | .        | .        | 1.52E-06 | 0.000254329 | 0.332331187 | 0.533329303 | 0.177175193 |
| hypo  | cg14020652 | chr9  | 38339334  | 38339335  | .        | .            | .              | .        | .        | 6.32E-06 | 0.00034625  | 0.331950899 | 0.329875467 | 0.109435653 |
| hypo  | cg15488794 | chr20 | 30262898  | 30262899  | BCL2L1   | NM_138578    | Body           | .        | .        | 1.38E-05 | 0.000467058 | 0.331376467 | 0.404630606 | 0.134018198 |
| hypo  | cg01106881 | chr2  | 220227421 | 220227422 | .        | .            | .              | S_Shelf  | .        | 5.36E-05 | 0.000945982 | 0.328808209 | 0.390185823 | 0.128229182 |
| hypo  | cg02298094 | chr12 | 111844675 | 111844676 | SH2B3    | NM_005475    | 5'UTR          | S_Shore  | .        | 2.10E-05 | 0.000568226 | 0.328760667 | 0.24262586  | 0.079698716 |
| hypo  | cg02017450 | chr10 | 10631669  | 10631670  | .        | .            | .              | .        | .        | 2.64E-05 | 0.000638148 | 0.328034436 | 0.516639432 | 0.169408328 |
| hypo  | cg14554869 | chr5  | 74231170  | 74231171  | .        | .            | .              | .        | .        | 4.55E-05 | 0.000858679 | 0.328017373 | 0.383287708 | 0.125657829 |
| hypo  | cg12433486 | chr15 | 72520803  | 72520804  | PKM2     | NM_182470    | 5'UTR          | N_Shore  | .        | 1.30E-06 | 0.000248521 | 0.327812019 | 0.420371064 | 0.137735468 |
| hypo  | cg16465027 | chr6  | 12595018  | 12595019  | .        | .            | .              | .        | .        | 7.67E-06 | 0.000367097 | 0.327347357 | 0.372313534 | 0.121808586 |
| hypo  | cg05377162 | chr1  | 185286995 | 185286996 | IVNS1ABP | NM_006469    | TSS150(S       | S_Shore  | Promoter | 3.73E-05 | 0.000767037 | 0.326673169 | 0.215948271 | 0.070477173 |
| hypo  | cg17879722 | chr21 | 43181728  | 43181729  | RIPK4    | NM_020639    | Body           | .        | .        | 5.14E-05 | 0.000922214 | 0.326629869 | 0.451177803 | 0.14730081  |
| hypo  | cg27543214 | chr6  | 30761827  | 30761828  | .        | .            | .              | .        | .        | 4.38E-06 | 0.000309823 | 0.324647143 | 0.615063463 | 0.19961106  |
| hypo  | cg16487653 | chr16 | 73200704  | 73200705  | .        | .            | .              | .        | .        | 1.56E-05 | 0.000493669 | 0.324411982 | 0.587421117 | 0.19049889  |
| hypo  | cg20907136 | chr6  | 33041220  | 33041221  | HLA-DPA1 | NM_033554    | Body           | .        | .        | 8.85E-06 | 0.000388122 | 0.323438432 | 0.358864026 | 0.116002762 |
| hypo  | cg10550882 | chr20 | 1825646   | 1825647   | .        | .            | .              | .        | .        | 3.85E-05 | 0.000781459 | 0.322783948 | 0.650603134 | 0.209936527 |
| hypo  | cg09657615 | chr6  | 128921651 | 128921652 | .        | .            | .              | .        | .        | 3.49E-06 | 0.000294266 | 0.322618251 | 0.399382461 | 0.128780333 |
| hypo  | cg02983090 | chr16 | 27437891  | 27437892  | IL21R    | NM_021798    | TSS1500        | Promoter | .        | 1.89E-06 | 0.000260866 | 0.322522648 | 0.322494527 | 0.103944041 |
| hypo  | cg09657963 | chr11 | 124790874 | 124790875 | HEPACAM  | NM_152722    | 3'UTR          | Island   | .        | 5.79E-05 | 0.000993027 | 0.322494146 | 0.243816674 | 0.078561699 |
| hypo  | cg20836412 | chr8  | 82543284  | 82543285  | .        | .            | .              | Island   | .        | 1.39E-05 | 0.000468249 | 0.321873353 | 0.278270281 | 0.089499976 |
| hypo  | cg01329005 | chr19 | 17516711  | 17516712  | BST2     | NM_004335    | TSS1500        | Promoter | .        | 2.75E-05 | 0.00065198  | 0.321671343 | 0.535906455 | 0.172317916 |
| hypo  | cg20040488 | chr6  | 28956509  | 28956510  | .        | .            | .              | Island   | .        | 4.66E-05 | 0.000870721 | 0.321134706 | 0.269186903 | 0.08637737  |

|      |            |       |           |           |            |              |                |          |          |          |             |             |             |             |
|------|------------|-------|-----------|-----------|------------|--------------|----------------|----------|----------|----------|-------------|-------------|-------------|-------------|
| hypo | cg22723502 | chr6  | 26240527  | 26240528  | HIST1H4F   | NM_003540    | TSS200         | N_Shore  | Promoter | 2.79E-05 | 0.000656034 | 0.319269998 | 0.417719238 | 0.133297147 |
| hypo | cg03367387 | chr3  | 197439333 | 197439334 | KIAA0226   | NM_014687    | Body           | .        | .        | 1.20E-05 | 0.000439301 | 0.31678741  | 0.585824878 | 0.185513625 |
| hypo | cg05675514 | chr6  | 22026014  | 22026015  | FLJ22536   | NR_015410    | Body           | .        | .        | 2.71E-05 | 0.000647666 | 0.316737937 | 0.496961917 | 0.157338366 |
| hypo | cg00134210 | chr10 | 14644131  | 14644132  | FAM107B    | NM_031453    | Body           | N_Shore  | .        | 4.75E-05 | 0.000880757 | 0.316201313 | 0.494021101 | 0.156141741 |
| hypo | cg07636095 | chr6  | 27759816  | 27759817  | .          | .            | .              | .        | .        | 3.04E-06 | 0.000285718 | 0.313937292 | 0.279937941 | 0.087814353 |
| hypo | cg03946324 | chr10 | 14995580  | 14995581  | DCLRE1C    | NM_001033855 | Body           | N_Shore  | .        | 6.52E-06 | 0.000348949 | 0.313694734 | 0.169935835 | 0.053239346 |
| hypo | cg22413056 | chr6  | 30650201  | 30650202  | KIAA1949   | NM_001134870 | Body           | .        | .        | 5.77E-05 | 0.000990921 | 0.312736374 | 0.394933586 | 0.123441371 |
| hypo | cg16250754 | chr5  | 40841578  | 40841579  | CARD6      | NM_032587    | 1stExon        | .        | .        | 1.14E-06 | 0.000247212 | 0.311710708 | 0.463314598 | 0.144351292 |
| hypo | cg24033661 | chr11 | 2920054   | 2920055   | SLC22A18A5 | NM_007105    | Body           | N_Shelf  | Promoter | 6.89E-06 | 0.000354887 | 0.311358381 | 0.411747771 | 0.128132255 |
| hypo | cg27093944 | chr2  | 242908217 | 242908218 | .          | .            | .              | .        | .        | 5.05E-05 | 0.00091326  | 0.311137169 | 0.528413131 | 0.164340079 |
| hypo | cg10308253 | chr6  | 149803110 | 149803111 | ZC3H12D    | NM_207360    | 5'UTR          | .        | .        | 5.67E-06 | 0.000334011 | 0.310988644 | 0.588854748 | 0.183058239 |
| hypo | cg05336982 | chr16 | 69564734  | 69564735  | .          | .            | .              | .        | .        | 1.24E-06 | 0.000248311 | 0.310138254 | 0.286552302 | 0.088801844 |
| hypo | cg18670236 | chr3  | 126630477 | 126630478 | CHCHD6     | NM_032343    | Body           | .        | .        | 3.57E-05 | 0.000747661 | 0.308820988 | 0.518550259 | 0.160070085 |
| hypo | cg12081743 | chr7  | 18535498  | 18535499  | HDAC9      | NM_058176    | TSS1500        | .        | Promoter | 1.82E-06 | 0.00025959  | 0.307457666 | 0.394115836 | 0.121104681 |
| hypo | cg05956608 | chr1  | 207999257 | 207999258 | .          | .            | .              | .        | .        | 1.11E-06 | 0.000247212 | 0.305695743 | 0.289431259 | 0.088408473 |
| hypo | cg06197966 | chr10 | 29948323  | 29948324  | SVIL       | NM_003174    | 5'UTR          | .        | .        | 1.41E-07 | 0.000239667 | 0.305135075 | 0.386149756 | 0.117758348 |
| hypo | cg12026563 | chr19 | 18415803  | 18415804  | .          | .            | .              | .        | .        | 2.88E-05 | 0.0006668   | 0.305079429 | 0.396196003 | 0.120801758 |
| hypo | cg17822706 | chr19 | 18415537  | 18415538  | .          | .            | .              | .        | .        | 4.25E-07 | 0.000239667 | 0.304941407 | 0.280598332 | 0.085496545 |
| hypo | cg19526685 | chr8  | 126963506 | 126963507 | .          | .            | .              | .        | Promoter | 2.01E-06 | 0.000263911 | 0.304881783 | 0.541212555 | 0.164936337 |
| hypo | cg08946844 | chr12 | 110511111 | 110511112 | .          | .            | .              | .        | .        | 1.28E-06 | 0.000248311 | 0.301927474 | 0.233426334 | 0.070408016 |
| hypo | cg15716680 | chr11 | 12864036  | 12864037  | TEAD1      | NM_021961    | Body           | .        | .        | 3.49E-06 | 0.000294206 | 0.300878979 | 0.367956741 | 0.110640537 |
| hypo | cg12956688 | chr19 | 18415645  | 18415646  | .          | .            | .              | .        | .        | 1.62E-06 | 0.000255546 | 0.300788002 | 0.361300725 | 0.108605002 |
| hypo | cg24547575 | chr6  | 31831680  | 31831681  | NEU1       | NM_000434    | TSS150(S_Shore | Promoter | .        | 3.24E-05 | 0.000708487 | 0.29814365  | 0.310970972 | 0.092643835 |
| hypo | cg21193484 | chr14 | 61938891  | 61938892  | PRKCH      | NM_006255    | Body           | .        | .        | 3.16E-05 | 0.000699076 | 0.297531417 | 0.554767036 | 0.164990376 |
| hypo | cg11706729 | chr6  | 32813153  | 32813154  | PSMB8      | NM_004159    | TSS150(S_Shore | Promoter | .        | 2.60E-07 | 0.000239667 | 0.296745406 | 0.26786038  | 0.079416012 |
| hypo | cg21571658 | chr15 | 70785398  | 70785399  | .          | .            | .              | .        | .        | 1.71E-05 | 0.000515611 | 0.29615317  | 0.306327908 | 0.090649596 |
| hypo | cg04786142 | chr1  | 234908380 | 234908381 | .          | .            | .              | .        | .        | 1.78E-05 | 0.000524329 | 0.295515316 | 0.608121119 | 0.179638656 |
| hypo | cg07474842 | chr6  | 136915087 | 136915088 | MAP3K5     | NM_005923    | Body           | .        | .        | 9.55E-07 | 0.000245873 | 0.292378394 | 0.509299601 | 0.148837437 |
| hypo | cg25296938 | chr7  | 98976899  | 98976900  | ARPC1B     | NM_005720    | 5'UTR          | S_Shelf  | .        | 6.25E-06 | 0.000344798 | 0.292284788 | 0.429242431 | 0.125390262 |
| hypo | cg06202585 | chr2  | 38325801  | 38325802  | .          | .            | .              | .        | .        | 1.52E-05 | 0.000487715 | 0.291473542 | 0.428756192 | 0.124900233 |
| hypo | cg13367647 | chr1  | 155213713 | 155213714 | GBA        | NM_001005742 | 5'UTR          | .        | .        | 4.71E-05 | 0.000875671 | 0.291202152 | 0.357684696 | 0.104087673 |
| hypo | cg03796321 | chr15 | 86162441  | 86162442  | AKAP13     | NM_007200    | Body           | .        | Promoter | 5.73E-06 | 0.000335583 | 0.290904159 | 0.494266309 | 0.143713215 |
| hypo | cg20019410 | chr2  | 207939049 | 207939050 | .          | .            | .              | .        | .        | 3.55E-05 | 0.000744957 | 0.289784231 | 0.403745391 | 0.116928026 |
| hypo | cg15575880 | chr6  | 33041217  | 33041218  | HLA-DPA1   | NM_033554    | Body           | .        | .        | 8.17E-06 | 0.000376817 | 0.286273868 | 0.466488156 | 0.133471996 |
| hypo | cg24366211 | chr11 | 68610705  | 68610706  | CPT1A      | NM_001031847 | TSS150(N_Shore | Promoter | .        | 5.21E-06 | 0.000326665 | 0.285018131 | 0.303144663 | 0.086330227 |
| hypo | cg09284066 | chr7  | 25892406  | 25892407  | .          | .            | .              | Island   | .        | 5.61E-06 | 0.00033288  | 0.28462655  | 0.242324143 | 0.068900347 |
| hypo | cg05109049 | chr17 | 29641332  | 29641333  | NF1        | NM_001042492 | Body           | .        | Promoter | 1.68E-05 | 0.000511441 | 0.283612522 | 0.394599792 | 0.111841803 |
| hypo | cg01889574 | chr11 | 44590888  | 44590889  | CD82       | NM_002231    | 5'UTR          | S_Shelf  | .        | 1.09E-05 | 0.000420726 | 0.283195394 | 0.329063303 | 0.093117531 |
| hypo | cg17528580 | chr10 | 69962885  | 69962886  | MYPN       | NM_032578    | Body           | .        | .        | 1.48E-06 | 0.000254329 | 0.280320625 | 0.41083744  | 0.11509424  |
| hypo | cg07643912 | chr19 | 50819173  | 50819174  | KCNC3      | NM_004977    | 3'UTR          | .        | .        | 5.77E-05 | 0.000991601 | 0.279946911 | 0.394163744 | 0.110272917 |
| hypo | cg27627038 | chr6  | 475037    | 475038    | .          | .            | .              | .        | .        | 1.68E-05 | 0.000510809 | 0.278722601 | 0.273943302 | 0.076282062 |
| hypo | cg02293936 | chr17 | 46671297  | 46671298  | LOC404266  | NR_033203    | Body           | Island   | Promoter | 1.14E-05 | 0.00042859  | 0.278577569 | 0.508672875 | 0.14163271  |
| hypo | cg20294319 | chr13 | 47253841  | 47253842  | LRCH1      | NM_015116    | Body           | .        | .        | 6.85E-06 | 0.000354451 | 0.277992368 | 0.551359538 | 0.153201543 |
| hypo | cg13379827 | chr1  | 65468781  | 65468782  | .          | .            | .              | Island   | .        | 2.37E-06 | 0.000271971 | 0.277188769 | 0.253422455 | 0.070173577 |
| hypo | cg23721586 | chr1  | 92197530  | 92197531  | TGFBFR3    | NM_003243    | Body           | .        | .        | 3.33E-06 | 0.000290742 | 0.276316205 | 0.395403592 | 0.109184052 |
| hypo | cg12578486 | chr13 | 100008956 | 100008957 | UBAC2      | NM_001144072 | Body           | .        | .        | 1.40E-05 | 0.000469247 | 0.274448109 | 0.568779455 | 0.156027891 |
| hypo | cg09701880 | chr2  | 112252253 | 112252254 | LOC541471  | NR_015395    | Body           | .        | .        | 1.87E-05 | 0.000537049 | 0.271417341 | 0.571770914 | 0.155115683 |
| hypo | cg20175702 | chr15 | 70053397  | 70053398  | .          | .            | .              | .        | .        | 2.40E-05 | 0.000608128 | 0.271044343 | 0.456011232 | 0.123526369 |
| hypo | cg11228682 | chr6  | 16320529  | 16320530  | ATXN1      | NM_001128164 | Body           | .        | .        | 2.48E-05 | 0.00061879  | 0.271013004 | 0.574352884 | 0.155584202 |
| hypo | cg19738463 | chr6  | 31831573  | 31831574  | NEU1       | NM_000434    | TSS150(S_Shore | Promoter | .        | 1.04E-06 | 0.000247212 | 0.268996178 | 0.415410168 | 0.111670647 |
| hypo | cg17837069 | chr10 | 30138587  | 30138588  | .          | .            | .              | .        | .        | 3.03E-07 | 0.000239667 | 0.268595668 | 0.29562553  | 0.079330596 |
| hypo | cg13995427 | chr9  | 117134860 | 117134861 | AKNA       | NM_030767    | Body           | .        | .        | 6.09E-06 | 0.000341589 | 0.26283093  | 0.603633479 | 0.158579831 |

|      |            |       |           |           |           |              |                |          |             |             |             |             |             |             |
|------|------------|-------|-----------|-----------|-----------|--------------|----------------|----------|-------------|-------------|-------------|-------------|-------------|-------------|
| hypo | cg20893203 | chr6  | 41499798  | 41499799  | .         | .            | .              | 2.58E-05 | 0.000629618 | 0.261221932 | 0.558334688 | 0.145775388 |             |             |
| hypo | cg06747543 | chr19 | 18589893  | 18589894  | ELL       | NM_006532    | Body           | 1.96E-06 | 0.000263494 | 0.258885444 | 0.312125928 | 0.080730748 |             |             |
| hypo | cg11214507 | chr1  | 210419937 | 210419938 | .         | .            | .              | 6.84E-07 | 0.000243374 | 0.256361424 | 0.507538081 | 0.130038822 |             |             |
| hypo | cg07218288 | chr6  | 32813210  | 32813211  | PSMB8     | NM_004159    | TSS150(S_Shore | Promoter | 2.99E-08    | 0.000239667 | 0.253344702 | 0.28086197  | 0.071080227 |             |
| hypo | cg06719604 | chr2  | 55361309  | 55361310  | .         | .            | .              | 1.39E-06 | 0.000249807 | 0.248561831 | 0.374783771 | 0.093081797 |             |             |
| hypo | cg07201215 | chr21 | 36419477  | 36419478  | RUNX1     | NM_001754    | Body           | 1.43E-07 | 0.000239667 | 0.248488664 | 0.201808128 | 0.050071881 |             |             |
| hypo | cg16754364 | chr16 | 29677968  | 29677969  | SPN       | NM_001030288 | 3'UTR          | S_Shore  | 1.60E-05    | 0.000499615 | 0.248465852 | 0.238576419 | 0.05920294  |             |
| hypo | cg11558551 | chr19 | 17516441  | 17516442  | BST2      | NM_004335    | TSS200         | Promoter | 2.01E-09    | 0.000239667 | 0.246495963 | 0.245665322 | 0.06048016  |             |
| hypo | cg05876246 | chr8  | 81831078  | 81831079  | .         | .            | .              | 6.16E-06 | 0.000342824 | 0.245951258 | 0.521927636 | 0.128293354 |             |             |
| hypo | cg19308375 | chr2  | 228324936 | 228324937 | .         | .            | .              | 3.95E-07 | 0.000239667 | 0.24589247  | 0.577058807 | 0.141819005 |             |             |
| hypo | cg18496653 | chr21 | 38593041  | 38593042  | .         | .            | .              | Island   | 1.24E-05    | 0.000445335 | 0.243717811 | 0.198485515 | 0.048298827 |             |
| hypo | cg23145794 | chr20 | 20433061  | 20433062  | RALGAPA2  | NM_020343    | Body           | N_Shore  | 3.72E-06    | 0.00029824  | 0.242960579 | 0.377592213 | 0.091664319 |             |
| hypo | cg22047295 | chr2  | 175462521 | 175462522 | WIPF1     | NM_003387    | 5'UTR          | .        | 2.66E-05    | 0.000640751 | 0.24208896  | 0.510790931 | 0.123581054 |             |
| hypo | cg13786863 | chr11 | 68610742  | 68610743  | CPT1A     | NM_001031847 | TSS150(N_Shore | Promoter | 1.80E-05    | 0.000526916 | 0.236940384 | 0.349882827 | 0.082825065 |             |
| hypo | cg10924691 | chr14 | 21439547  | 21439548  | .         | .            | .              | N_Shore  | 2.81E-05    | 0.000658196 | 0.235379208 | 0.370760548 | 0.087192862 |             |
| hypo | cg24626312 | chr17 | 46671331  | 46671332  | LOC404266 | NR_033203    | Body           | Island   | Promoter    | 1.47E-05    | 0.000480538 | 0.234897211 | 0.31718163  | 0.07442857  |
| hypo | cg10153335 | chr17 | 46671292  | 46671293  | LOC404266 | NR_033203    | Body           | Island   | Promoter    | 4.61E-05    | 0.000865221 | 0.23257743  | 0.548864068 | 0.127576652 |
| hypo | cg06061086 | chr6  | 41499639  | 41499640  | .         | .            | .              | 4.80E-07 | 0.000239667 | 0.232067185 | 0.589502752 | 0.136727451 |             |             |
| hypo | cg14043253 | chr8  | 81830960  | 81830961  | .         | .            | .              | 9.83E-07 | 0.000245873 | 0.230830483 | 0.459454722 | 0.105979238 |             |             |
| hypo | cg07706715 | chr1  | 161510193 | 161510194 | .         | .            | .              | 3.82E-05 | 0.000778723 | 0.227783781 | 0.246691791 | 0.056115167 |             |             |
| hypo | cg15583014 | chr1  | 65468658  | 65468659  | .         | .            | .              | Island   | 1.52E-06    | 0.000254329 | 0.227269846 | 0.130263614 | 0.029527719 |             |
| hypo | cg03071808 | chr2  | 242908130 | 242908131 | .         | .            | .              | 1.49E-05 | 0.000484257 | 0.226565848 | 0.39433008  | 0.089264386 |             |             |
| hypo | cg03130910 | chr1  | 234908225 | 234908226 | .         | .            | .              | 1.65E-05 | 0.000507903 | 0.226520376 | 0.482815951 | 0.109290303 |             |             |
| hypo | cg22806907 | chr17 | 40826211  | 40826212  | PLEKHH3   | NM_024927    | Body           | N_Shore  | 2.24E-05    | 0.000587229 | 0.225625672 | 0.402610905 | 0.090761919 |             |
| hypo | cg24203709 | chr15 | 42187178  | 42187179  | SPTBN5    | NM_016642    | TSS1500        | Promoter | 4.68E-09    | 0.000239667 | 0.224255906 | 0.290623865 | 0.065096544 |             |
| hypo | cg10087036 | chr16 | 19130460  | 19130461  | ITPRIPL2  | NM_001034841 | 1stExon        | S_Shelf  | 4.48E-05    | 0.000852534 | 0.220522499 | 0.467774097 | 0.103076765 |             |
| hypo | cg20245757 | chr17 | 46663758  | 46663759  | .         | .            | .              | S_Shelf  | 9.65E-06    | 0.000401459 | 0.220353615 | 0.395667189 | 0.087108731 |             |
| hypo | cg26590411 | chr4  | 119199645 | 119199646 | SNORA24   | NR_002963    | TSS150(Island  | Promoter | 2.56E-06    | 0.000274886 | 0.214515333 | 0.10825681  | 0.023144197 |             |
| hypo | cg02413040 | chr21 | 36419647  | 36419648  | RUNX1     | NM_001754    | Body           | .        | 2.74E-07    | 0.000239667 | 0.214176618 | 0.303609169 | 0.064947403 |             |
| hypo | cg24345715 | chr19 | 13898672  | 13898673  | .         | .            | .              | 7.87E-07 | 0.000244182 | 0.205171778 | 0.287400073 | 0.058886901 |             |             |
| hypo | cg25320388 | chr11 | 6767765   | 6767766   | .         | .            | .              | 2.53E-05 | 0.000623235 | 0.202850913 | 0.443729615 | 0.089931243 |             |             |
| hypo | cg11623922 | chr6  | 27759385  | 27759386  | .         | .            | .              | 7.34E-06 | 0.000362122 | 0.201784135 | 0.378677731 | 0.076331337 |             |             |
| hypo | cg22491409 | chr12 | 125198294 | 125198295 | .         | .            | .              | 2.68E-06 | 0.000277493 | 0.180898922 | 0.476188427 | 0.086060063 |             |             |
| hypo | cg14541915 | chr11 | 65894462  | 65894463  | PACS1     | NM_018026    | Body           | .        | 2.74E-06    | 0.000278759 | 0.175066438 | 0.400649064 | 0.070057711 |             |
| hypo | cg13475583 | chr1  | 235116730 | 235116731 | .         | .            | .              | 7.29E-06 | 0.000361207 | 0.173215444 | 0.333758596 | 0.057729465 |             |             |
| hypo | cg00455424 | chr1  | 65468814  | 65468815  | .         | .            | .              | Island   | 2.82E-05    | 0.0006595   | 0.17063815  | 0.20394024  | 0.034717049 |             |
| hypo | cg24166450 | chr17 | 74248465  | 74248466  | .         | .            | .              | 6.82E-08 | 0.000239667 | 0.165090835 | 0.271397918 | 0.044721818 |             |             |

**Supplemental Table S2.** Primer information in this study

| Gene     | Target        | Methylation specific PCR   |                             |
|----------|---------------|----------------------------|-----------------------------|
|          |               | Forward Primer (5'-3')     | Reverse Primer (5'-3')      |
| TRPM4    | Unmethylation | TTTTGGGTTGTAGGAGGTTGT      | ACCCAAAAATCTAAATATCCAACAC   |
|          | Methylation   | TTTGGGTTGTAGGAGTTGC        | ACCCAAAAATCTAAATATCCAACG    |
| MUM1     | Unmethylation | ATTTTGTTTTAGGATATATTGGTGT  | CAAAATAATAACTATCACCTTCACA   |
|          | Methylation   | AAATTCGTTTTAGGATATATTGGC   | CAAAATAATAACTATCACCTTCGCA   |
| EPHA4    | Unmethylation | TATTTATTTTATTGGGATAGAAGTGG | CCCTAAAACCTATAACAACATCACA   |
|          | Methylation   | TATTTATTTTATTGGGATAGAAGCGG | TACCCTAAAACCTATAACAACGTCG   |
| SFRS1    | Unmethylation | GTTGTAGAGTATGGTGGGATAATGT  | AATCAAATCTTAAAAAATAATCAAT   |
|          | Methylation   | GTCGTAGAGTATGGTGGGATAAC    | AATCGAATCTTAAAAAATAATCGAT   |
| MDFIC    | Unmethylation | GGGTAAAGGTTTTAAATGTATATGT  | AAAACTTTAAAAATATCCTAACAAA   |
|          | Methylation   | AGGGTTAAGGTTTTAAACGTATAC   | AAAACTTTAAAAATATCCTAACGAA   |
| FHIT     | Unmethylation | AGAAATTTAGTTAGTGGGAAGTTGT  | AAAAAAATTTAAAACATAAATCACA   |
|          | Methylation   | AGAAATTTAGTTAGTGGGAAGTCGT  | AAAAAAATTTAAAACATAAATCGCA   |
| CDT1     | Unmethylation | TTAAGAGAGTGGATTATTGAATTGG  | ACCTAAAAATAACATAAACCCCATATA |
|          | Methylation   | TTTTAAGAGAGCGGATTATTGAATC  | CCTAAAAATAACGTAACCCCGTATA   |
| TPPP     | Unmethylation | GTGGTTGTGTTTATTATTTTTTGT   | AAAACCTCTACCTTACAAAACCAAC   |
|          | Methylation   | CGGTCGCGTTTATTATTTTTTC     | GAAACCTCTACCTTACAAAACCGA    |
| ZFP36L1  | Unmethylation | TTTTAGTTTGGAGTTAGAAAGGTGA  | AATCAAAAATAATAACAAACACAAA   |
|          | Methylation   | GTTTTAGTTCGGAGTTAGAAAGGC   | AATCGAAAATAATAACAAACACGAA   |
| EP400    | Unmethylation | ATTTTAAATGATTTTTTTGTTTTGG  | AATTACATATATAAACACCACACC    |
|          | Methylation   | TGATTTTAAATGATTTTTTCGTTTC  | AAATTACATATATAAACACCACGC    |
| RUNX3    | Unmethylation | TTACGAGGGGCGGTCTACGCGGG    | AAAACGACCGACGCGAACGCTCC     |
|          | Methylation   | TTATGAGGGGTGGTTGTATGTGGG   | AAAACAACCAACACAAACACCTCC    |
| KBTBD11  | Unmethylation | TTTGGTATTATGGAAATTTATTGT   | ATATAACCTCTACCTCCCCTCAAA    |
|          | Methylation   | TTTCGGTATTATGGAAATTTATC    | AATATAACCTCTACCTCCCCTCG     |
| PPP1R15A | Unmethylation | TTTGATTAATATGGAGAAATTATGT  | CTCAAACATAAATACAAAAAACAAT   |
|          | Methylation   | TTTGATTAATATGGAGAAATTACGT  | TCAAACATAAATACAAAAAACGAT    |
| ANXA2    | Unmethylation | TATTGAGTAAGGGAGTTGGTTAAATG | ATAACTTTAAACCCAAAATTTTATA   |
|          | Methylation   | TATCGAGTAAGGGAGTTGGTTAAAC  | ATAACTTTAAACCCGAAATTTTCGTA  |
| HNRNPUL1 | Unmethylation | TAGTTTGATTTATGGGAATAGTTGA  | AAAAAACAAATTATAAAAAACACAAC  |
|          | Methylation   | GATAGTTCGATTTACGGGAATAGTC  | ACGAAAAACAATATAAAAAACACG    |
| C19orf24 | Unmethylation | GGGGTGGTTAGTTTTTGTTTATAAT  | TCTTCCCTATCAAATCCTACTCATA   |
|          | Methylation   | GGGCGGTTAGTTTTTGTTTATAAC   | TTCCCTATCGAATCCTACTCGTA     |
| PUSL1    | Unmethylation | ATTTTGTTTTAGGATATATTGGTGT  | CAAAATAATAACTATCACCTTCACA   |
|          | Methylation   | AAATTCGTTTTAGGATATATTGGC   | CAAAATAATAACTATCACCTTCGCA   |
| Alu      | Methylation   | ATTAGTCGGGCGTGGTGG         | CCCGAATTCAAACGATTCTCC       |

  

| Gene | locus                           | Bisulfite sequencing    |                             |
|------|---------------------------------|-------------------------|-----------------------------|
|      |                                 | Forward Primer (5'-3')  | Reverse Primer (5'-3')      |
| FHIT | Chr3<br>(59,747,277-61,251,452) | TTAGAAAGATTAGAGTGGGAAAT | CCCCTTACAAAAAATTTAAA ACATAA |

### Supplemental Table S3. List of hypermethylated genes for gene network analysis (related to Figure 5)

| Input ID | Gene ID | Gene Symbol | Description                                                      | Biological Process (GO)                                                                                                                                                                                                                                                                              |
|----------|---------|-------------|------------------------------------------------------------------|------------------------------------------------------------------------------------------------------------------------------------------------------------------------------------------------------------------------------------------------------------------------------------------------------|
| ZFP36L1  | 677     | ZFP36L1     | ZFP36 ring finger protein like 1                                 | GO:0045657 positive regulation of monocyte differentiation;<br>GO:0097403 cellular response to raffinose;GO:0060710 chorio-allantoic fusion                                                                                                                                                          |
| ANXA2    | 302     | ANXA2       | annexin A2                                                       | GO:0052362 catabolism by host of symbiont protein;GO:1905602 positive regulation of receptor-mediated endocytosis involved in cholesterol transport;GO:0052417 metabolism by host of symbiont protein                                                                                                |
| EP400    | 57634   | EP400       | E1A binding protein p400                                         | GO:0043968 histone H2A acetylation;GO:0043967 histone H4 acetylation;GO:0016573 histone acetylation                                                                                                                                                                                                  |
| FHIT     | 2272    | FHIT        | fragile histidine triad diadenosine triphosphatase               | GO:0032435 negative regulation of proteasomal ubiquitin-dependent protein catabolic process;<br>GO:2000059 negative regulation of ubiquitin-dependent protein catabolic process;GO:1901799 negative regulation of proteasomal protein catabolic process                                              |
| TPPP     | 11076   | TPPP        | tubulin polymerization promoting protein                         | GO:0046785 microtubule polymerization;GO:0032273 positive regulation of protein polymerization;GO:0001578 microtubule bundle formation                                                                                                                                                               |
| IL5RA    | 3568    | IL5RA       | interleukin 5 receptor subunit alpha                             | GO:0038043 interleukin-5-mediated signaling pathway;GO:0032674 regulation of interleukin-5 production;GO:0032634 interleukin-5 production                                                                                                                                                            |
| KBTBD11  | 9920    | KBTBD11     | kelch repeat and BTB domain containing 11                        |                                                                                                                                                                                                                                                                                                      |
| MDFIC    | 29969   | MDFIC       | MyoD family inhibitor domain containing                          | GO:0007257 activation of JUN kinase activity;GO:0042308 negative regulation of protein import into nucleus;GO:0050434 positive regulation of viral transcription                                                                                                                                     |
| MUM1     | 3662    | IRF4        | interferon regulatory factor 4                                   | GO:0072540 T-helper 17 cell lineage commitment;GO:0002295 T-helper cell lineage commitment;GO:0072539 T-helper 17 cell differentiation                                                                                                                                                               |
| PUSL1    | 126789  | PUSL1       | pseudouridine synthase like 1                                    | GO:0031119 tRNA pseudouridine synthesis;GO:0001522 pseudouridine synthesis;GO:0006400 tRNA modification                                                                                                                                                                                              |
| RUNX3    | 864     | RUNX3       | RUNX family transcription factor 3                               | GO:0043378 positive regulation of CD8-positive, alpha-beta T cell differentiation;<br>GO:0043376 regulation of CD8-positive, alpha-beta T cell differentiation;GO:0043371 negative regulation of CD4-positive, alpha-beta T cell differentiation                                                     |
| C19orf24 | 55009   | FAM174C     | family with sequence similarity 174 member C                     |                                                                                                                                                                                                                                                                                                      |
| TRPM4    | 54795   | TRPM4       | transient receptor potential cation channel subfamily M member 4 | GO:1903949 positive regulation of atrial cardiac muscle cell action potential;<br>GO:0086047 membrane depolarization during Purkinje myocyte cell action potential;GO:0086048 membrane depolarization during bundle of His cell action potential                                                     |
| PPP1R15A | 23645   | PPP1R15A    | protein phosphatase 1 regulatory subunit 15A                     | GO:1903917 positive regulation of endoplasmic reticulum stress-induced eIF2 alpha dephosphorylation;GO:1903916 regulation of endoplasmic reticulum stress-induced eIF2 alpha dephosphorylation;GO:0036497 eIF2alpha dephosphorylation in response to endoplasmic reticulum stress                    |
| CDT1     | 81620   | CDT1        | chromatin licensing and DNA replication factor 1                 | GO:1902426 deactivation of mitotic spindle assembly checkpoint;GO:0090266 regulation of mitotic cell cycle spindle assembly checkpoint;<br>GO:1903504 regulation of mitotic spindle checkpoint                                                                                                       |
| SFRS1    | 6426    | SRSF1       | serine and arginine rich splicing factor 1                       | GO:0000395 mRNA 5'-splice site recognition;GO:0006406 mRNA export from nucleus;GO:0006376 mRNA splice site selection                                                                                                                                                                                 |
| EPHA4    | 2043    | EPHA4       | EPH receptor A4                                                  | GO:2001108 positive regulation of Rho guanyl-nucleotide exchange factor activity;GO:0021957 corticospinal tract morphogenesis;<br>GO:0097156 fasciculation of motor neuron axon                                                                                                                      |
| CCDC42B  | 387885  | CFAP73      | cilia and flagella associated protein 73                         | GO:0036159 inner dynein arm assembly;GO:0070286 axonemal dynein complex assembly;GO:2000574 regulation of microtubule motor activity                                                                                                                                                                 |
| HNRNPUL1 | 11100   | HNRNPUL1    | heterogeneous nuclear ribonucleoprotein U like 1                 | GO:0000398 mRNA splicing, via spliceosome;GO:0009615 response to virus;GO:0000377 RNA splicing, via transesterification reactions with bulged adenosine as nucleophile                                                                                                                               |
| TRIM10   | 10107   | TRIM10      | tripartite motif containing 10                                   | GO:0046597 negative regulation of viral entry into host cell;GO:0046596 regulation of viral entry into host cell;GO:0046718 viral entry into host cell                                                                                                                                               |
| CACNA1C  | 775     | CACNA1C     | calcium voltage-gated channel subunit alpha1 C                   | GO:0010881 regulation of cardiac muscle contraction by regulation of the release of sequestered calcium ion;GO:0010880 regulation of release of sequestered calcium ion into cytosol by sarcoplasmic reticulum;GO:0098912 membrane depolarization during atrial cardiac muscle cell action potential |
| RHPN2    | 85415   | RHPN2       | rhopilin Rho GTPase binding protein 2                            | GO:0007165 signal transduction;GO:0023052 signaling;GO:0007154 cell communication                                                                                                                                                                                                                    |
| SLMAP    | 7871    | SLMAP       | sarcolemma associated protein                                    | GO:1905150 regulation of voltage-gated sodium channel activity;GO:1900825 regulation of membrane depolarization during cardiac muscle cell action potential;GO:0098902 regulation of membrane depolarization during action potential                                                                 |
| CYP46A1  | 10858   | CYP46A1     | cytochrome P450 family 46 subfamily A member 1                   | GO:0006707 cholesterol catabolic process;GO:1900271 regulation of long-term synaptic potentiation;GO:0042448 progesterone metabolic process                                                                                                                                                          |
| VEZF1    | 7716    | VEZF1       | vascular endothelial zinc finger 1                               | GO:0045603 positive regulation of endothelial cell differentiation;GO:0045601 regulation of endothelial cell differentiation;GO:0001885 endothelial cell development                                                                                                                                 |
| FAM55B   | 120406  | NXPE2       | neurexophilin and PC-esterase domain family member 2             |                                                                                                                                                                                                                                                                                                      |
| C9orf3   | 84909   | AOPEP       | aminopeptidase O (putative)                                      | GO:0002003 angiotensin maturation;GO:0002002 regulation of angiotensin levels in blood;GO:0001991 regulation of systemic arterial blood pressure by circulatory renin-angiotensin                                                                                                                    |
| LMF1     | 64788   | LMF1        | lipase maturation factor 1                                       | GO:0051006 positive regulation of lipoprotein lipase activity;GO:0034382 chylomicron remnant clearance;GO:0061365 positive regulation of triglyceride lipase activity                                                                                                                                |
| MLXIP    | 22877   | MLXIP       | MLX interacting protein                                          | GO:1900402 regulation of carbohydrate metabolic process by regulation of transcription from RNA polymerase II promoter;<br>GO:0006109 regulation of carbohydrate metabolic process;GO:0045944 positive regulation of transcription by RNA polymerase II                                              |
| VAT1L    | 57687   | VAT1L       | vesicle amine transport 1 like                                   | GO:0055114 oxidation-reduction process;GO:0008152 metabolic process;GO:0008150 biological_process                                                                                                                                                                                                    |
| PDZRN3   | 23024   | PDZRN3      | PDZ domain containing ring finger 3                              | GO:0007528 neuromuscular junction development;GO:0016567 protein ubiquitination;GO:0050808 synapse organization                                                                                                                                                                                      |

|           |          |         |                                                                      |                                                                                                                                                                                                                                      |
|-----------|----------|---------|----------------------------------------------------------------------|--------------------------------------------------------------------------------------------------------------------------------------------------------------------------------------------------------------------------------------|
| FAT1      | 2195     | FAT1    | FAT atypical cadherin 1                                              | GO:0045197 establishment or maintenance of epithelial cell apical/basal polarity;GO:0003382 epithelial cell morphogenesis;GO:0048593 camera-type eye morphogenesis                                                                   |
| SDK1      | 221935   | SDK1    | sidekick cell adhesion molecule 1                                    | GO:0010842 retina layer formation;GO:0060998 regulation of dendritic spine development;GO:0048148 behavioral response to cocaine                                                                                                     |
| KCNK10    | 54207    | KCNK10  | potassium two pore domain channel subfamily K member 10              | GO:0030322 stabilization of membrane potential;GO:0071805 potassium ion transmembrane transport;GO:0007613 memory                                                                                                                    |
| MYO10     | 4651     | MYO10   | myosin X                                                             | GO:0038096 Fc-gamma receptor signaling pathway involved in phagocytosis;<br>GO:0002431 Fc receptor mediated stimulatory signaling pathway;GO:0038094 Fc-gamma receptor signaling pathway                                             |
| ATG12     | 9140     | ATG12   | autophagy related 12                                                 | GO:0006501 C-terminal protein lipidation;GO:0018410 C-terminal protein amino acid modification;GO:0000422 autophagy of mitochondrion                                                                                                 |
| NUP210L   | 91181    | NUP210L | nucleoporin 210 like                                                 | GO:0060009 Sertoli cell development;GO:0060008 Sertoli cell differentiation;GO:0007286 spermatid development                                                                                                                         |
| SPATA2L   | 124044   | SPATA2L | spermatogenesis associated 2 like                                    |                                                                                                                                                                                                                                      |
| HOXA3     | 3200     | HOXA3   | homeobox A3                                                          | GO:0021615 glossopharyngeal nerve morphogenesis;GO:0021563 glossopharyngeal nerve development;GO:1900122 positive regulation of receptor binding                                                                                     |
| LOC201651 | 201651   | AADACP1 | arylacetamide deacetylase pseudogene 1                               |                                                                                                                                                                                                                                      |
| KLK11     | 11012    | KLK11   | kallikrein related peptidase 11                                      | GO:0006508 proteolysis;GO:0019538 protein metabolic process;GO:1901564 organonitrogen compound metabolic process                                                                                                                     |
| ABAT      | 18       | ABAT    | 4-aminobutyrate aminotransferase                                     | GO:1904450 positive regulation of aspartate secretion;GO:1904448 regulation of aspartate secretion;GO:0014053 negative regulation of gamma-aminobutyric acid secretion                                                               |
| CD63      | 967      | CD63    | CD63 molecule                                                        | GO:0035646 endosome to melanosome transport;GO:0043485 endosome to pigment granule transport;GO:0048757 pigment granule maturation                                                                                                   |
| CDH22     | 64405    | CDH22   | cadherin 22                                                          | GO:0016339 calcium-dependent cell-cell adhesion via plasma membrane cell adhesion molecules;<br>GO:0044331 cell-cell adhesion mediated by cadherin;GO:0007043 cell-cell junction assembly                                            |
| FRMPD2    | 143162   | FRMPD2  | FERM and PDZ domain containing 2                                     | GO:0070830 bicellular tight junction assembly;GO:0120192 tight junction assembly;GO:0043297 apical junction assembly                                                                                                                 |
| ADSSL1    | 122622   | ADSS1   | adenylosuccinate synthase 1                                          | GO:0044208 'de novo' AMP biosynthetic process;GO:0006167 AMP biosynthetic process;GO:0006531 aspartate metabolic process                                                                                                             |
| LIMA1     | 51474    | LIMA1   | LIM domain and actin binding 1                                       | GO:0030299 intestinal cholesterol absorption;GO:0030835 negative regulation of actin filament depolymerization;GO:0098856 intestinal lipid absorption                                                                                |
| PCGF2     | 7703     | PCGF2   | polycomb group ring finger 2                                         | GO:0036353 histone H2A-K119 monoubiquitination;GO:0035518 histone H2A monoubiquitination;GO:0070317 negative regulation of G0 to G1 transition                                                                                       |
| TMEM87A   | 25963    | TMEM87A | transmembrane protein 87A                                            | GO:0042147 retrograde transport, endosome to Golgi;GO:0016482 cytosolic transport;GO:0016197 endosomal transport                                                                                                                     |
| PODXL2    | 50512    | PODXL2  | podocalyxin like 2                                                   | GO:0050901 leukocyte tethering or rolling;GO:0061756 leukocyte adhesion to vascular endothelial cell;GO:0045123 cellular extravasation                                                                                               |
| SLC9A2    | 6549     | SLC9A2  | solute carrier family 9 member A2                                    | GO:0098719 sodium ion import across plasma membrane;GO:0051453 regulation of intracellular pH;GO:0030641 regulation of cellular pH                                                                                                   |
| LIMCH1    | 22998    | LIMCH1  | LIM and calponin homology domains 1                                  | GO:0051496 positive regulation of stress fiber assembly;GO:0051492 regulation of stress fiber assembly;GO:0051893 regulation of focal adhesion assembly                                                                              |
| HOXA4     | 3201     | HOXA4   | homeobox A4                                                          | GO:0048704 embryonic skeletal system morphogenesis;GO:0048706 embryonic skeletal system development;GO:0048705 skeletal system morphogenesis                                                                                         |
| C9orf71   | 169693   | TMEM252 | transmembrane protein 252                                            |                                                                                                                                                                                                                                      |
| OSCP1     | 127700   | OSCP1   | organic solute carrier partner 1                                     | GO:1990961 drug transmembrane export;GO:0046618 drug export;GO:0006855 drug transmembrane transport                                                                                                                                  |
| TLX1NB    | 10003824 | TLX1NB  | TLX1 neighbor                                                        |                                                                                                                                                                                                                                      |
| MACF1     | 23499    | MACF1   | microtubule actin crosslinking factor 1                              | GO:0045773 positive regulation of axon extension;GO:0051893 regulation of focal adhesion assembly;GO:0050772 positive regulation of axonogenesis                                                                                     |
| ADO       | 84890    | ADO     | 2-aminoethanethiol dioxxygenase                                      | GO:0000098 sulfur amino acid catabolic process;GO:0000096 sulfur amino acid metabolic process;GO:0044273 sulfur compound catabolic process                                                                                           |
| UTS2D     | 257313   | UTS2B   | urotensin 2B                                                         | GO:0097746 regulation of blood vessel diameter;GO:0050880 regulation of blood vessel size;GO:0035296 regulation of tube diameter                                                                                                     |
| CAPN13    | 92291    | CAPN13  | calpain 13                                                           | GO:0006508 proteolysis;GO:0019538 protein metabolic process;GO:1901564 organonitrogen compound metabolic process                                                                                                                     |
| C12orf72  | 254013   | ETFBKMT | electron transfer flavoprotein subunit beta lysine methyltransferase | GO:1904736 negative regulation of fatty acid beta-oxidation using acyl-CoA dehydrogenase;GO:1904735 regulation of fatty acid beta-oxidation using acyl-CoA dehydrogenase;GO:0031999 negative regulation of fatty acid beta-oxidation |
| MTMR11    | 10903    | MTMR11  | myotubularin related protein 11                                      |                                                                                                                                                                                                                                      |
| MLST8     | 64223    | MLST8   | MTOR associated protein, LST8 homolog                                | GO:0032148 activation of protein kinase B activity;GO:1900034 regulation of cellular response to heat;GO:0032008 positive regulation of TOR signaling                                                                                |
| WIZ       | 58525    | WIZ     | WIZ zinc finger                                                      | GO:0010571 positive regulation of nuclear cell cycle DNA replication;GO:0033262 regulation of nuclear cell cycle DNA replication;<br>GO:2000105 positive regulation of DNA-dependent DNA replication                                 |
| ARID5B    | 84159    | ARID5B  | AT-rich interaction domain 5B                                        | GO:0060613 fat pad development;GO:0060325 face morphogenesis;GO:0008585 female gonad development                                                                                                                                     |
| CISH      | 1154     | CISH    | cytokine inducible SH2 containing protein                            | GO:0046627 negative regulation of insulin receptor signaling pathway;GO:0038111 interleukin-7-mediated signaling pathway;<br>GO:1900077 negative regulation of cellular response to insulin stimulus                                 |

|          |          |          |                                                                      |                                                                                                                                                                                                                                                   |
|----------|----------|----------|----------------------------------------------------------------------|---------------------------------------------------------------------------------------------------------------------------------------------------------------------------------------------------------------------------------------------------|
| MIR760   | 10012634 | MIR760   | microRNA 760                                                         | GO:0035195 gene silencing by miRNA;GO:0035194 posttranscriptional gene silencing by RNA;GO:0016441 posttranscriptional gene silencing                                                                                                             |
| AFAP1    | 60312    | AFAP1    | actin filament associated protein 1                                  | GO:0051493 regulation of cytoskeleton organization;GO:0033043 regulation of organelle organization;GO:0007010 cytoskeleton organization                                                                                                           |
| C6orf145 | 221749   | PXDC1    | PX domain containing 1                                               |                                                                                                                                                                                                                                                   |
| PSORS1C1 | 170679   | PSORS1C1 | psoriasis susceptibility 1 candidate 1                               |                                                                                                                                                                                                                                                   |
| C17orf64 | 124773   | C17orf64 | chromosome 17 open reading frame 64                                  |                                                                                                                                                                                                                                                   |
| MYLK     | 4638     | MYLK     | myosin light chain kinase                                            | GO:0060414 aorta smooth muscle tissue morphogenesis;GO:0035909 aorta morphogenesis;GO:0071476 cellular hypotonic response                                                                                                                         |
| KIAA1026 |          | None     | None                                                                 | None                                                                                                                                                                                                                                              |
| EHD2     | 30846    | EHD2     | EH domain containing 2                                               | GO:2001137 positive regulation of endocytic recycling;GO:1901741 positive regulation of myoblast fusion;GO:1901739 regulation of myoblast fusion                                                                                                  |
| ALDH3A1  | 218      | ALDH3A1  | aldehyde dehydrogenase 3 family member A1                            | GO:0051591 response to cAMP;GO:0051384 response to glucocorticoid;GO:0006805 xenobiotic metabolic process                                                                                                                                         |
| SLC22A11 | 55867    | SLC22A11 | solute carrier family 22 member 11                                   | GO:0046415 urate metabolic process;GO:0015698 inorganic anion transport;GO:0015711 organic anion transport                                                                                                                                        |
| TOM1L2   | 146691   | TOM1L2   | target of myb1 like 2 membrane trafficking protein                   | GO:0045839 negative regulation of mitotic nuclear division;GO:0051784 negative regulation of nuclear division;GO:0007088 regulation of mitotic nuclear division                                                                                   |
| ARHGAP12 | 94134    | ARHGAP12 | Rho GTPase activating protein 12                                     | GO:0051058 negative regulation of small GTPase mediated signal transduction;GO:0002011 morphogenesis of an epithelial sheet;<br>GO:0006911 phagocytosis, engulfment                                                                               |
| JMJD8    | 339123   | JMJD8    | jumonji domain containing 8                                          | GO:1903302 regulation of pyruvate kinase activity;GO:0006110 regulation of glycolytic process;GO:1903672 positive regulation of sprouting angiogenesis                                                                                            |
| KTN1     | 3895     | KTN1     | kinectin 1                                                           | GO:0043687 post-translational protein modification;GO:0007018 microtubule-based movement;GO:0007017 microtubule-based process                                                                                                                     |
| LHCGR    | 3973     | LHCGR    | luteinizing hormone/choriogonadotropin receptor                      | GO:0032962 positive regulation of inositol trisphosphate biosynthetic process;GO:0032960 regulation of inositol trisphosphate biosynthetic process;<br>GO:0071373 cellular response to luteinizing hormone stimulus                               |
| RAD21    | 5885     | RAD21    | RAD21 cohesin complex component                                      | GO:0045841 negative regulation of mitotic metaphase/anaphase transition;GO:0045876 positive regulation of sister chromatid cohesion;<br>GO:0030071 regulation of mitotic metaphase/anaphase transition                                            |
| IFI27    | 3429     | IFI27    | interferon alpha inducible protein 27                                | GO:0044827 modulation by host of viral genome replication;GO:0044788 modulation by host of viral process;<br>GO:0046825 regulation of protein export from nucleus                                                                                 |
| KTELC1   | 56983    | POGLUT1  | protein O-glucosyltransferase 1                                      | GO:0018242 protein O-linked glycosylation via serine;GO:0048318 axial mesoderm development;GO:0048339 paraxial mesoderm development                                                                                                               |
| BCAS3    | 54828    | BCAS3    | BCAS3 microtubule associated cell migration factor                   | GO:0051895 negative regulation of focal adhesion assembly;GO:0051893 regulation of focal adhesion assembly;<br>GO:2000251 positive regulation of actin cytoskeleton reorganization                                                                |
| AGTR1    | 185      | AGTR1    | angiotensin II receptor type 1                                       | GO:0002018 renin-angiotensin regulation of aldosterone production;GO:2000858 regulation of aldosterone secretion;GO:0035932 aldosterone secretion                                                                                                 |
| FLJ41603 |          | None     | None                                                                 | None                                                                                                                                                                                                                                              |
| DEPDC5   | 9681     | DEPDC5   | DEP domain containing 5                                              | GO:1904262 negative regulation of TORC1 signaling;GO:0034198 cellular response to amino acid starvation;GO:1903432 regulation of TORC1 signaling                                                                                                  |
| ADD3     | 120      | ADD3     | adducin 3                                                            | GO:0051016 barbed-end actin filament capping;GO:0051693 actin filament capping;GO:0030835 negative regulation of actin filament depolymerization                                                                                                  |
| POP7     | 10248    | POP7     | POP7 homolog, ribonuclease P/MRP subunit                             | GO:0001682 tRNA 5'-leader removal;GO:0099116 tRNA 5'-end processing;GO:0034471 ncRNA 5'-end processing                                                                                                                                            |
| RAPGEF4  | 11069    | RAPGEF4  | Rap guanine nucleotide exchange factor 4                             | GO:0050796 regulation of insulin secretion;GO:0030073 insulin secretion;GO:0090276 regulation of peptide hormone secretion                                                                                                                        |
| IL22RA1  | 58985    | IL22RA1  | interleukin 22 receptor subunit alpha 1                              | GO:0050829 defense response to Gram-negative bacterium;GO:0042742 defense response to bacterium;GO:0019221 cytokine-mediated signaling pathway                                                                                                    |
| PTK7     | 5754     | PTK7     | protein tyrosine kinase 7 (inactive)                                 | GO:0090179 planar cell polarity pathway involved in neural tube closure;GO:0090178 regulation of establishment of planar polarity involved in neural tube closure<br>;GO:0090177 establishment of planar polarity involved in neural tube closure |
| UCN3     | 114131   | UCN3     | urocortin 3                                                          | GO:0032024 positive regulation of insulin secretion;GO:0051412 response to corticosterone;GO:0090277 positive regulation of peptide hormone secretion                                                                                             |
| TFCP2L1  | 29842    | TFCP2L1  | transcription factor CP2 like 1                                      | GO:0002070 epithelial cell maturation;GO:0007431 salivary gland development;GO:0007028 cytoplasm organization                                                                                                                                     |
| ANO4     | 121601   | ANO4     | anoctamin 4                                                          | GO:0061589 calcium activated phosphatidylserine scrambling;GO:0061590 calcium activated phosphatidylcholine scrambling<br>GO:0061591 calcium activated galactosylceramide scrambling                                                              |
| RBM47    | 54502    | RBM47    | RNA binding motif protein 47                                         | GO:0016554 cytidine to uridine editing;GO:0016553 base conversion or substitution editing;GO:0002244 hematopoietic progenitor cell differentiation                                                                                                |
| WDR1     | 9948     | WDR1     | WD repeat domain 1                                                   | GO:0042247 establishment of planar polarity of follicular epithelium;GO:0030043 actin filament fragmentation;<br>GO:0030836 positive regulation of actin filament depolymerization                                                                |
| PPM1F    | 9647     | PPM1F    | protein phosphatase, Mg <sup>2+</sup> /Mn <sup>2+</sup> dependent 1F | GO:0044387 negative regulation of protein kinase activity by regulation of protein phosphorylation;GO:0051894 positive regulation of focal adhesion assembly;<br>GO:0051496 positive regulation of stress fiber assembly                          |
| MPL      | 4352     | MPL      | MPL proto-oncogene, thrombopoietin receptor                          | GO:1905221 positive regulation of platelet formation;GO:1905219 regulation of platelet formation;GO:1990959 eosinophil homeostasis                                                                                                                |

|         |        |          |                                                       |                                                                                                                                                                                                                                                               |
|---------|--------|----------|-------------------------------------------------------|---------------------------------------------------------------------------------------------------------------------------------------------------------------------------------------------------------------------------------------------------------------|
| SPRED2  | 200734 | SPRED2   | sprouty related EVH1 domain containing 2              | GO:000188 inactivation of MAPK activity;GO:0043517 positive regulation of DNA damage response, signal transduction by p53 class mediator;GO:0010801 negative regulation of peptidyl-threonine phosphorylation                                                 |
| RNF13   | 11342  | RNF13    | ring finger protein 13                                | GO:0051865 protein autoubiquitination;GO:0006511 ubiquitin-dependent protein catabolic process;GO:0019941 modification-dependent protein catabolic process                                                                                                    |
| LRRFIP1 | 9208   | LRRFIP1  | LRR binding FLII interacting protein 1                | GO:0032481 positive regulation of type I interferon production;GO:0051092 positive regulation of NF-kappaB transcription factor activity;GO:0032479 regulation of type I interferon production                                                                |
| C1R     | 715    | C1R      | complement C1r                                        | GO:0006958 complement activation, classical pathway;GO:0030449 regulation of complement activation;GO:0002455 humoral immune response mediated by circulating immunoglobulin                                                                                  |
| TEAD1   | 7003   | TEAD1    | TEA domain transcription factor 1                     | GO:1902895 positive regulation of pri-miRNA transcription by RNA polymerase II;GO:1902893 regulation of pri-miRNA transcription by RNA polymerase II;GO:0061614 pri-miRNA transcription by RNA polymerase II                                                  |
| POLA2   | 23649  | POLA2    | DNA polymerase alpha 2, accessory subunit             | GO:0032201 telomere maintenance via semi-conservative replication;GO:0033260 nuclear DNA replication;GO:0006270 DNA replication initiation                                                                                                                    |
| GPX5    | 2880   | GPX5     | glutathione peroxidase 5                              | GO:0098869 cellular oxidant detoxification;GO:1990748 cellular detoxification;GO:0098754 detoxification                                                                                                                                                       |
| CCDC57  | 284001 | CCDC57   | coiled-coil domain containing 57                      |                                                                                                                                                                                                                                                               |
| ARSA    | 410    | ARSA     | arylsulfatase A                                       | GO:0043312 neutrophil degranulation;GO:0006687 glycosphingolipid metabolic process;GO:0002283 neutrophil activation involved in immune response                                                                                                               |
| SIL1    | 64374  | SIL1     | SIL1 nucleotide exchange factor                       | GO:0006457 protein folding;GO:0006886 intracellular protein transport;GO:0015031 protein transport                                                                                                                                                            |
| EFHB    | 151651 | EFHB     | EF-hand domain family member B                        | GO:2001256 regulation of store-operated calcium entry;GO:0070884 regulation of calcineurin-NFAT signaling cascade;GO:0002115 store-operated calcium entry                                                                                                     |
| CACNA1H | 8912   | CACNA1H  | calcium voltage-gated channel subunit alpha1 H        | GO:2000344 positive regulation of acrosome reaction;GO:0032342 aldosterone biosynthetic process;GO:0034651 cortisol biosynthetic process                                                                                                                      |
| GTPBP1  | 9567   | GTPBP1   | GTP binding protein 1                                 | GO:0046039 GTP metabolic process;GO:0061014 positive regulation of mRNA catabolic process;GO:1901068 guanosine-containing compound metabolic process                                                                                                          |
| NXP2    | 11249  | NXP2     | neurexophilin 2                                       | GO:0007218 neuropeptide signaling pathway;GO:0007186 G protein-coupled receptor signaling pathway;GO:0007165 signal transduction                                                                                                                              |
| ENC1    | 8507   | ENC1     | ectodermal-neural cortex 1                            | GO:0010499 proteasomal ubiquitin-independent protein catabolic process;GO:0017148 negative regulation of translation;GO:0034249 negative regulation of cellular amide metabolic process                                                                       |
| NEURL3  | 93082  | NEURL3   | neuralized E3 ubiquitin protein ligase 3              | GO:0016567 protein ubiquitination;GO:0032446 protein modification by small protein conjugation;GO:0070647 protein modification by small protein conjugation or removal                                                                                        |
| HNRNPF  | 3185   | HNRNPF   | heterogeneous nuclear ribonucleoprotein F             | GO:0035722 interleukin-12-mediated signaling pathway;GO:0071349 cellular response to interleukin-12;GO:0070671 response to interleukin-12                                                                                                                     |
| PITPNC1 | 26207  | PITPNC1  | phosphatidylinositol transfer protein cytoplasmic 1   | GO:0015914 phospholipid transport;GO:0015748 organophosphate ester transport;GO:0006869 lipid transport                                                                                                                                                       |
| TRIM2   | 23321  | TRIM2    | tripartite motif containing 2                         | GO:0043161 proteasome-mediated ubiquitin-dependent protein catabolic process;GO:0043523 regulation of neuron apoptotic process;GO:0000209 protein polyubiquitination                                                                                          |
| BAG2    | 9532   | BAG2     | BCL2 associated athanogene 2                          | GO:1904667 negative regulation of ubiquitin protein ligase activity;GO:0051444 negative regulation of ubiquitin-protein transferase activity;GO:1904666 regulation of ubiquitin protein ligase activity                                                       |
| KCNIP4  | 80333  | KCNIP4   | potassium voltage-gated channel interacting protein 4 | GO:1901379 regulation of potassium ion transmembrane transport;GO:0061337 cardiac conduction;GO:0043266 regulation of potassium ion transport                                                                                                                 |
| RAG1AP1 | 55974  | SLC50A1  | solute carrier family 50 member 1                     | GO:0042946 glucoside transport;GO:1901656 glycoside transport;GO:0008645 hexose transmembrane transport                                                                                                                                                       |
| ZFX4    | 79776  | ZFX4     | zinc finger homeobox 4                                | GO:0000122 negative regulation of transcription by RNA polymerase II;GO:0045892 negative regulation of transcription, DNA-templated;GO:1903507 negative regulation of nucleic acid-templated transcription                                                    |
| DIP2C   | 22982  | DIP2C    | disco interacting protein 2 homolog C                 | GO:0008150 biological_process                                                                                                                                                                                                                                 |
| LGI4    | 163175 | LGI4     | leucine rich repeat LGI family member 4               | GO:0022011 myelination in peripheral nervous system;GO:0014044 Schwann cell development;GO:0031641 regulation of myelination                                                                                                                                  |
| EIF4G1  | 1981   | EIF4G1   | eukaryotic translation initiation factor 4 gamma 1    | GO:1905618 positive regulation of miRNA mediated inhibition of translation;GO:1905612 positive regulation of mRNA cap binding;GO:1905537 positive regulation of eukaryotic translation initiation factor 4F complex assembly                                  |
| RICH2   | 9912   | ARHGAP44 | Rho GTPase activating protein 44                      | GO:0099152 regulation of neurotransmitter receptor transport, endosome to postsynaptic membrane;GO:0098887 neurotransmitter receptor transport, endosome to postsynaptic membrane;GO:0099639 neurotransmitter receptor transport, endosome to plasma membrane |
| WIP1    | 55062  | WIP1     | WD repeat domain, phosphoinositide interacting 1      | GO:0048203 vesicle targeting, trans-Golgi to endosome;GO:0034497 protein localization to phagophore assembly site;GO:0048199 vesicle targeting, to, from or within Golgi                                                                                      |
| ZMYND15 | 84225  | ZMYND15  | zinc finger MYND-type containing 15                   | GO:0007286 spermatid development;GO:0048515 spermatid differentiation;GO:0007283 spermatogenesis                                                                                                                                                              |
| RNF220  | 55182  | RNF220   | ring finger protein 220                               | GO:0090263 positive regulation of canonical Wnt signaling pathway;GO:0051865 protein autoubiquitination;GO:0030177 positive regulation of Wnt signaling pathway                                                                                               |
| MATN2   | 4147   | MATN2    | matrilin 2                                            | GO:0003429 growth plate cartilage chondrocyte morphogenesis;GO:0003414 chondrocyte morphogenesis involved in endochondral bone morphogenesis;GO:0031104 dendrite regeneration                                                                                 |
| LPAR6   | 10161  | LPAR6    | lysophosphatidic acid receptor 6                      | GO:0051482 positive regulation of cytosolic calcium ion concentration involved in phospholipase C-activating G protein-coupled signaling pathway;GO:0001835 blastocyst hatching;GO:0035025 positive regulation of Rho protein signal transduction             |
| IBTK    | 25998  | IBTK     | inhibitor of Bruton tyrosine kinase                   | GO:0051209 release of sequestered calcium ion into cytosol;GO:0097553 calcium ion transmembrane import into cytosol;GO:0061099 negative regulation of protein tyrosine kinase activity                                                                        |



|          |        |          |                                                                                |                                                                                                                                                                                                                                                                |
|----------|--------|----------|--------------------------------------------------------------------------------|----------------------------------------------------------------------------------------------------------------------------------------------------------------------------------------------------------------------------------------------------------------|
| GARS     | 2617   | GARS1    | glycyl-tRNA synthetase 1                                                       | GO:0070150 mitochondrial glycyl-tRNA aminoacylation;GO:0006426 glycyl-tRNA aminoacylation;GO:0015966 diadenosine tetraphosphate biosynthetic process                                                                                                           |
| CDC42EP1 | 11135  | CDC42EP1 | CDC42 effector protein 1                                                       | GO:0031274 positive regulation of pseudopodium assembly;GO:0031272 regulation of pseudopodium assembly;GO:0031269 pseudopodium assembly                                                                                                                        |
| HMSD     | 284293 | HMSD     | histocompatibility minor serpin domain containing                              | GO:0010951 negative regulation of endopeptidase activity;GO:0010466 negative regulation of peptidase activity;GO:0045861 negative regulation of proteolysis                                                                                                    |
| CSNK1D   | 1453   | CSNK1D   | casein kinase 1 delta                                                          | GO:1905426 positive regulation of Wnt-mediated midbrain dopaminergic neuron differentiation;GO:1905424 regulation of Wnt-mediated midbrain dopaminergic neuron differentiation; GO:1904958 positive regulation of midbrain dopaminergic neuron differentiation |
| SLC39A2  | 29986  | SLC39A2  | solute carrier family 39 member 2                                              | GO:0071577 zinc ion transmembrane transport;GO:0006829 zinc ion transport;GO:0000041 transition metal ion transport                                                                                                                                            |
| PIK3CD   | 5293   | PIK3CD   | phosphatidylinositol-4,5-bisphosphate 3-kinase catalytic subunit delta         | GO:0033031 positive regulation of neutrophil apoptotic process;GO:0060374 mast cell differentiation;GO:0033029 regulation of neutrophil apoptotic process                                                                                                      |
| SHC4     | 399694 | SHC4     | SHC adaptor protein 4                                                          | GO:0048863 stem cell differentiation;GO:0008284 positive regulation of cell proliferation;GO:0006915 apoptotic process                                                                                                                                         |
| NALCN    | 259232 | NALCN    | sodium leak channel, non-selective                                             | GO:0060075 regulation of resting membrane potential;GO:0035725 sodium ion transmembrane transport;GO:0071805 potassium ion transmembrane transport                                                                                                             |
| CTDSPL   | 10217  | CTDSPL   | CTD small phosphatase like                                                     | GO:2000134 negative regulation of G1/S transition of mitotic cell cycle;GO:1902807 negative regulation of cell cycle G1/S phase transition; GO:2000045 regulation of G1/S transition of mitotic cell cycle                                                     |
| AHNAK    | 79026  | AHNAK    | AHNAK nucleoprotein                                                            | GO:1901385 regulation of voltage-gated calcium channel activity;GO:1901019 regulation of calcium ion transmembrane transporter activity; GO:1903169 regulation of calcium ion transmembrane transport                                                          |
| LGALS1   | 3956   | LGALS1   | galectin 1                                                                     | GO:0002317 plasma cell differentiation;GO:0034120 positive regulation of erythrocyte aggregation;GO:0046598 positive regulation of viral entry into host cell                                                                                                  |
| RDH5     | 5959   | RDH5     | retinol dehydrogenase 5                                                        | GO:0042572 retinol metabolic process;GO:0001523 retinoid metabolic process;GO:0016101 diterpenoid metabolic process                                                                                                                                            |
| IRF8     | 3394   | IRF8     | interferon regulatory factor 8                                                 | GO:0032735 positive regulation of interleukin-12 production;GO:0042832 defense response to protozoan; GO:0060333 interferon-gamma-mediated signaling pathway                                                                                                   |
| PDE4A    | 5141   | PDE4A    | phosphodiesterase 4A                                                           | GO:0006198 cAMP catabolic process;GO:0009214 cyclic nucleotide catabolic process;GO:0009154 purine ribonucleotide catabolic process                                                                                                                            |
| PRKCE    | 5581   | PRKCE    | protein kinase C epsilon                                                       | GO:0035669 TRAM-dependent toll-like receptor 4 signaling pathway;GO:2001031 positive regulation of cellular glucuronidation; GO:0035668 TRAM-dependent toll-like receptor signaling pathway                                                                    |
| FOXP2    | 93986  | FOXP2    | forkhead box P2                                                                | GO:0021757 caudate nucleus development;GO:0021758 putamen development; GO:0060501 positive regulation of epithelial cell proliferation involved in lung morphogenesis                                                                                          |
| YWHAE    | 7531   | YWHAE    | tyrosine 3-monooxygenase/tryptophan 5-monooxygenase activation protein epsilon | GO:1900740 positive regulation of protein insertion into mitochondrial membrane involved in apoptotic signaling pathway;GO:1905913 negative regulation of calcium ion export across plasma membrane; GO:0003064 regulation of heart rate by hormone            |
| NR5A2    | 2494   | NR5A2    | nuclear receptor subfamily 5 group A member 2                                  | GO:0045070 positive regulation of viral genome replication;GO:0061113 pancreas morphogenesis;GO:1903902 positive regulation of viral life cycle                                                                                                                |
| HOXA5    | 3202   | HOXA5    | homeobox A5                                                                    | GO:0060480 lung goblet cell differentiation;GO:0060574 intestinal epithelial cell maturation;GO:0060481 lobar bronchus epithelium development                                                                                                                  |
| PRMT8    | 56341  | PRMT8    | protein arginine methyltransferase 8                                           | GO:0019919 peptidyl-arginine methylation, to asymmetrical-dimethyl arginine;GO:0035247 peptidyl-arginine omega-N-methylation ;GO:0035246 peptidyl-arginine N-methylation                                                                                       |
| C11orf49 | 79096  | C11orf49 | chromosome 11 open reading frame 49                                            |                                                                                                                                                                                                                                                                |
| RAB20    | 55647  | RAB20    | RAB20, member RAS oncogene family                                              | GO:0090383 phagosome acidification;GO:0090385 phagosome-lysosome fusion;GO:0051452 intracellular pH reduction                                                                                                                                                  |
| HMGA2    | 8091   | HMGA2    | high mobility group AT-hook 2                                                  | GO:2000685 positive regulation of cellular response to X-ray;GO:0035978 histone H2A-S139 phosphorylation; GO:0045869 negative regulation of single stranded viral RNA replication via double stranded DNA intermediate                                         |
| VARS2    | 57176  | VARS2    | valyl-tRNA synthetase 2, mitochondrial                                         | GO:0006438 valyl-tRNA aminoacylation;GO:0106074 aminoacyl-tRNA metabolism involved in translational fidelity; GO:0006418 tRNA aminoacylation for protein translation                                                                                           |
| ZMIZ1    | 57178  | ZMIZ1    | zinc finger MIZ-type containing 1                                              | GO:0007296 vitellogenesis;GO:0045582 positive regulation of T cell differentiation;GO:0048096 chromatin-mediated maintenance of transcription                                                                                                                  |
| ZNF704   | 619279 | ZNF704   | zinc finger protein 704                                                        | GO:0006357 regulation of transcription by RNA polymerase II;GO:0006366 transcription by RNA polymerase II; GO:0006355 regulation of transcription, DNA-templated                                                                                               |
| CTNND1   | 1500   | CTNND1   | catenin delta 1                                                                | GO:0035635 entry of bacterium into host cell;GO:0030260 entry into host cell;GO:0051806 entry into cell of other organism involved in symbiotic interaction                                                                                                    |
| FARP1    | 10160  | FARP1    | FERM, ARH/RhoGEF and pleckstrin domain protein 1                               | GO:0010923 negative regulation of phosphatase activity;GO:0048813 dendrite morphogenesis;GO:0035305 negative regulation of dephosphorylation                                                                                                                   |
| PDE1A    | 5136   | PDE1A    | phosphodiesterase 1A                                                           | GO:0046069 cGMP catabolic process;GO:0009214 cyclic nucleotide catabolic process;GO:0009154 purine ribonucleotide catabolic process                                                                                                                            |
| ANKRD10  | 55608  | ANKRD10  | ankyrin repeat domain 10                                                       |                                                                                                                                                                                                                                                                |
| EPHB2    | 2048   | EPHB2    | EPH receptor B2                                                                | GO:1904782 negative regulation of NMDA glutamate receptor activity;GO:0048170 positive regulation of long-term neuronal synaptic plasticity; GO:0099557 trans-synaptic signaling by trans-synaptic complex, modulating synaptic transmission                   |
| ADRBK1   | 156    | GRK2     | G protein-coupled receptor kinase 2                                            | GO:0003108 negative regulation of the force of heart contraction by chemical signal;GO:0003057 regulation of the force of heart contraction by chemical signal; GO:0045988 negative regulation of striated muscle contraction                                  |
| FAM60A   | 58516  | SINHCAF  | SIN3-HDAC complex associated factor                                            | GO:0030336 negative regulation of cell migration;GO:2000146 negative regulation of cell motility;GO:0051271 negative regulation of cellular component movement                                                                                                 |

|          |        |          |                                                  |                                                                                                                                                                                                                                                                                                                  |
|----------|--------|----------|--------------------------------------------------|------------------------------------------------------------------------------------------------------------------------------------------------------------------------------------------------------------------------------------------------------------------------------------------------------------------|
| GOLSYN   | 55638  | SYBU     | syntabulin                                       | GO:1990048 anterograde neuronal dense core vesicle transport;GO:0099519 dense core granule cytoskeletal transport;GO:0035774 positive regulation of insulin secretion involved in cellular response to glucose stimulus                                                                                          |
| PPIL6    | 285755 | PPIL6    | peptidylprolyl isomerase like 6                  | GO:0000413 protein peptidyl-prolyl isomerization;GO:0042026 protein refolding;GO:0018208 peptidyl-proline modification                                                                                                                                                                                           |
| NRXN3    | 9369   | NRXN3    | neurexin 3                                       | GO:0007158 neuron cell-cell adhesion;GO:0071625 vocalization behavior;GO:0007411 axon guidance                                                                                                                                                                                                                   |
| C6orf62  | 81688  | C6orf62  | chromosome 6 open reading frame 62               | GO:0008150 biological_process                                                                                                                                                                                                                                                                                    |
| SNORA38  | 677820 | SNORA38  | small nucleolar RNA, H/ACA box 38                | GO:0006396 RNA processing;GO:0016070 RNA metabolic process;GO:0090304 nucleic acid metabolic process                                                                                                                                                                                                             |
| SULT2A1  | 6822   | SULT2A1  | sulfotransferase family 2A member 1              | GO:0030573 bile acid catabolic process;GO:0050427 3'-phosphoadenosine 5'-phosphosulfate metabolic process;GO:0006068 ethanol catabolic process                                                                                                                                                                   |
| PXT1     | 222659 | PXT1     | peroxisomal testis enriched protein 1            | GO:0043065 positive regulation of apoptotic process;GO:0043068 positive regulation of programmed cell death;GO:0010942 positive regulation of cell death                                                                                                                                                         |
| MON1A    | 84315  | MON1A    | MON1 homolog A, secretory trafficking associated | GO:0006623 protein targeting to vacuole;GO:0072666 establishment of protein localization to vacuole;GO:0072665 protein localization to vacuole                                                                                                                                                                   |
| FJX1     | 24147  | FJX1     | four-jointed box kinase 1                        | GO:0010842 retina layer formation;GO:0060042 retina morphogenesis in camera-type eye;GO:0003407 neural retina development                                                                                                                                                                                        |
| AGPAT9   | 79888  | LPCAT1   | lysophosphatidylcholine acyltransferase 1        | GO:2001246 negative regulation of phosphatidylcholine biosynthetic process;GO:2001245 regulation of phosphatidylcholine biosynthetic process;GO:0036148 phosphatidylglycerol acyl-chain remodeling                                                                                                               |
| FAM63A   | 55793  | MINDY1   | MINDY lysine 48 deubiquitinase 1                 | GO:0071108 protein K48-linked deubiquitination;GO:0016579 protein deubiquitination;GO:0070646 protein modification by small protein removal                                                                                                                                                                      |
| STARD7   | 56910  | STARD7   | STAR related lipid transfer domain containing 7  | GO:0006656 phosphatidylcholine biosynthetic process;GO:0046470 phosphatidylcholine metabolic process;GO:0015914 phospholipid transport                                                                                                                                                                           |
| HINT2    | 84681  | HINT2    | histidine triad nucleotide binding protein 2     | GO:2000757 negative regulation of peptidyl-lysine acetylation;GO:1901984 negative regulation of protein acetylation;GO:2000756 regulation of peptidyl-lysine acetylation                                                                                                                                         |
| EMP1     | 2012   | EMP1     | epithelial membrane protein 1                    | GO:0032060 bleb assembly;GO:0008544 epidermis development;GO:0120031 plasma membrane bounded cell projection assembly                                                                                                                                                                                            |
| PDE1C    | 5137   | PDE1C    | phosphodiesterase 1C                             | GO:0007165 signal transduction;GO:0023052 signaling;GO:0007154 cell communication                                                                                                                                                                                                                                |
| FLJ32810 |        | None     | None                                             | None                                                                                                                                                                                                                                                                                                             |
| FGFBP1   | 9982   | FGFBP1   | fibroblast growth factor binding protein 1       | GO:1903589 positive regulation of blood vessel endothelial cell proliferation involved in sprouting angiogenesis;GO:0090050 positive regulation of cell migration involved in sprouting angiogenesis;GO:1903587 regulation of blood vessel endothelial cell proliferation involved in sprouting angiogenesis     |
| NUMA1    | 4926   | NUMA1    | nuclear mitotic apparatus protein 1              | GO:1902365 positive regulation of protein localization to spindle pole body;GO:1902846 positive regulation of mitotic spindle elongation;GO:1902363 regulation of protein localization to spindle pole body                                                                                                      |
| WDR47    | 22911  | WDR47    | WD repeat domain 47                              | GO:0007275 multicellular organism development;GO:0048856 anatomical structure development;GO:0032502 developmental process                                                                                                                                                                                       |
| TNKS1BP1 | 85456  | TNKS1BP1 | tankyrase 1 binding protein 1                    | GO:0006977 DNA damage response, signal transduction by p53 class mediator resulting in cell cycle arrest;GO:0072431 signal transduction involved in mitotic G1 DNA damage checkpoint;GO:0031571 mitotic G1 DNA damage checkpoint                                                                                 |
| RSPH4A   | 345895 | RSPH4A   | radial spoke head component 4A                   | GO:0060294 cilium movement involved in cell motility;GO:0060285 cilium-dependent cell motility;GO:0035082 axoneme assembly                                                                                                                                                                                       |
| ABCA1    | 19     | ABCA1    | ATP binding cassette subfamily A member 1        | GO:0090108 positive regulation of high-density lipoprotein particle assembly;GO:0090107 regulation of high-density lipoprotein particle assembly;GO:0010875 positive regulation of cholesterol efflux                                                                                                            |
| FLT1     | 2321   | FLT1     | fms related tyrosine kinase 1                    | GO:0036323 vascular endothelial growth factor receptor-1 signaling pathway;GO:1905563 negative regulation of vascular endothelial cell proliferation;GO:0030949 positive regulation of vascular endothelial growth factor receptor signaling pathway                                                             |
| EMP2     | 2013   | EMP2     | epithelial membrane protein 2                    | GO:0003093 regulation of glomerular filtration;GO:0070836 caveola assembly;GO:2001212 regulation of vasculogenesis                                                                                                                                                                                               |
| VPS25    | 84313  | VPS25    | vacuolar protein sorting 25 homolog              | GO:0007175 negative regulation of epidermal growth factor-activated receptor activity;GO:0043328 protein transport to vacuole involved in ubiquitin-dependent protein catabolic process via the multivesicular body sorting pathway;GO:0007176 regulation of epidermal growth factor-activated receptor activity |
| SEPW1    | 6415   | SELENOW  | selenoprotein W                                  | GO:0010269 response to selenium ion;GO:0098869 cellular oxidant detoxification;GO:1990748 cellular detoxification                                                                                                                                                                                                |
| CYP4F12  | 66002  | CYP4F12  | cytochrome P450 family 4 subfamily F member 12   | GO:0003095 pressure natriuresis;GO:0036101 leukotriene B4 catabolic process;GO:0036100 leukotriene catabolic process                                                                                                                                                                                             |
| C6orf47  | 57827  | C6orf47  | chromosome 6 open reading frame 47               |                                                                                                                                                                                                                                                                                                                  |
| BTBD18   | 643376 | BTBD18   | BTB domain containing 18                         | GO:1990511 piRNA biosynthetic process;GO:0007141 male meiosis I;GO:0032968 positive regulation of transcription elongation from RNA polymerase II promoter                                                                                                                                                       |
| FOXJ3    | 22887  | FOXJ3    | forkhead box J3                                  | GO:0045944 positive regulation of transcription by RNA polymerase II;GO:0045893 positive regulation of transcription, DNA-templated;GO:1903508 positive regulation of nucleic acid-templated transcription                                                                                                       |
| CAMK1D   | 57118  | CAMK1D   | calcium/calmodulin dependent protein kinase ID   | GO:0090023 positive regulation of neutrophil chemotaxis;GO:0071624 positive regulation of granulocyte chemotaxis;GO:0090022 regulation of neutrophil chemotaxis                                                                                                                                                  |
| C4orf51  | 646603 | C4orf51  | chromosome 4 open reading frame 51               |                                                                                                                                                                                                                                                                                                                  |
| RANBP3L  | 202151 | RANBP3L  | RAN binding protein 3 like                       | GO:1901706 mesenchymal cell differentiation involved in bone development;GO:0045663 positive regulation of myoblast differentiation;GO:0045668 negative regulation of osteoblast differentiation                                                                                                                 |

COL21A1 81578 COL21A1 collagen type XXI alpha 1 chain

GO:0003429 growth plate cartilage chondrocyte morphogenesis;GO:0003414 chondrocyte morphogenesis involved in endochondral bone morphogenesis;  
GO:0003422 growth plate cartilage morphogenesis

**Supplemental Figure S1.** Venn diagram showing the proportion of genome-wide coverage of 135 differentially methylated CpG sites. Promoters, gene bodies, intergenic regions, and gene 3' ends are shown (left panel). The differentially methylated CpG sites were annotated according to CpG islands, CpG shores (2-kb regions flanking CpG islands) and CpG shelves (2-kb regions flanking CpG shores) (right panel).

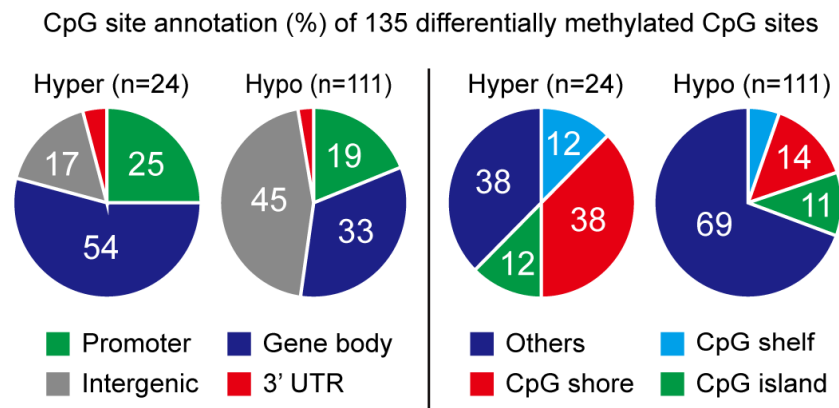

**Supplemental Figure S2.** Methylation analysis of the *FHIT* promoter regions in patient with CD samples. Gel-based MSP results of *FHIT* gene (related to Figure 3b). We tested 207 patient with CD samples but here we show the representative results (n=36 CD samples) to related Figure 3b in the text. The PCR products distinguish between unmethylated (U) and methylated (M). Gray circle indicated we count on unmethylated samples but rest of samples showed methylation signal. DKO cells were used as an unmethylated control. IVD: in-vitro methylated control, H<sub>2</sub>O: water control containing no DNA.

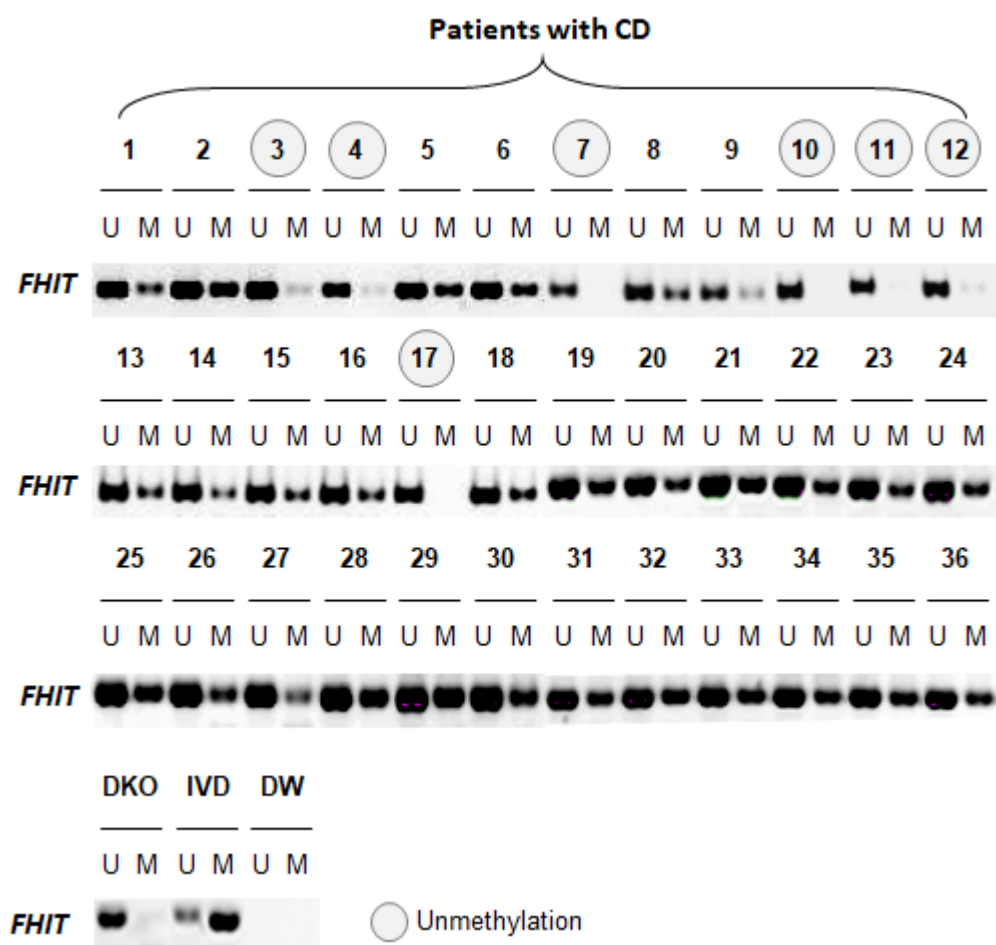

**Supplemental Figure S3.** Biological functional implication of hypermethylated genes in CD. GO analysis was conducted using Metascape. Each heatmap of the implicated biological pathways indicates those pathways significantly associated with the genes in the network.

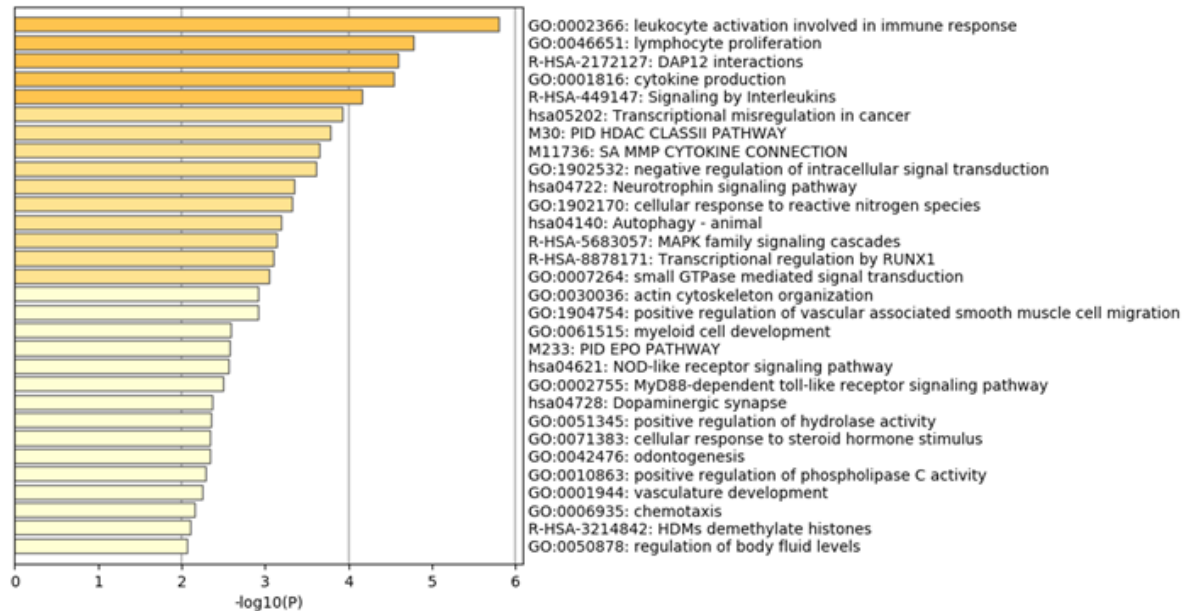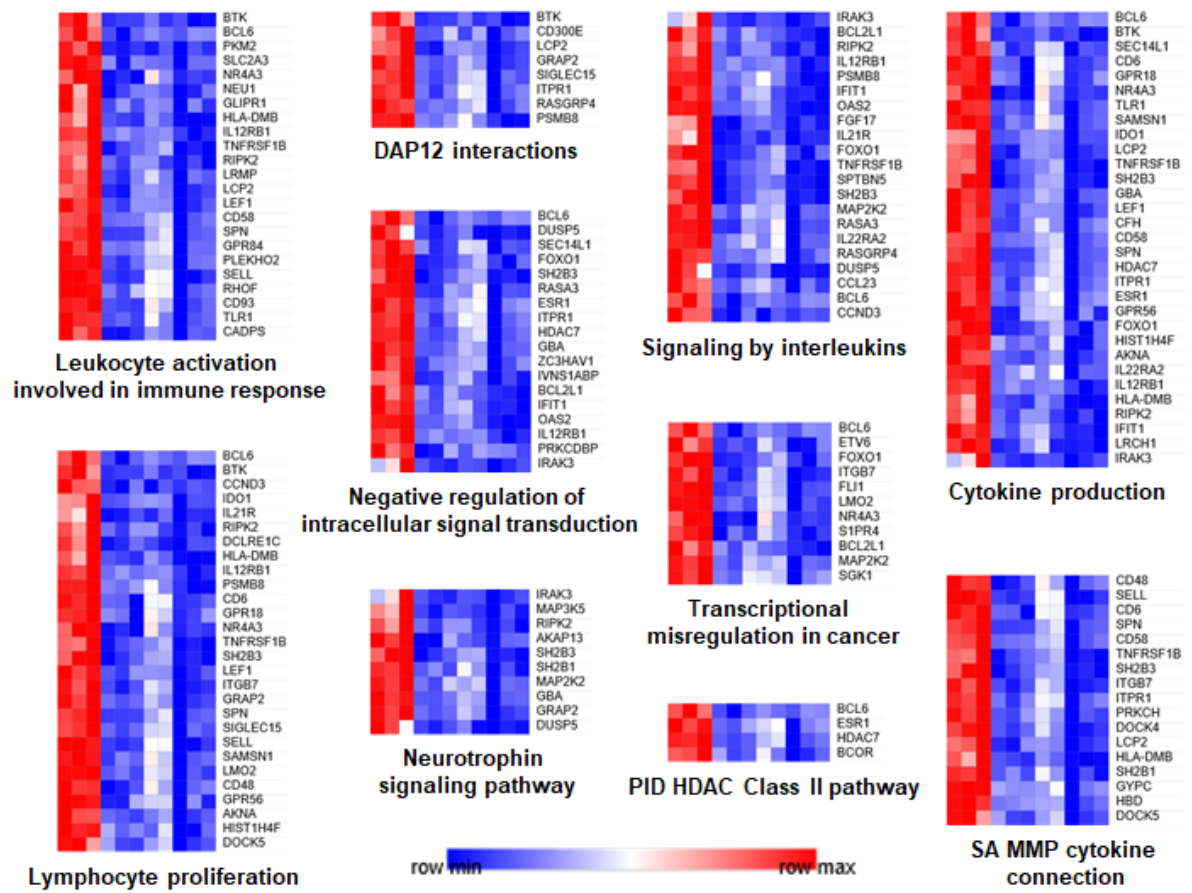

**Supplemental Figure S4.** Implication of the clinical relevance of *FHIT* gene methylation in patients with CD. Kaplan-Meier survival curves for disease duration [over 5 years] from diagnosis to sampling based on *FHIT* methylation for 88 patients with CD. A probability of  $< 0.05$  (log-rank test  $*p < 0.05$ ) was considered to represent a statistically significant difference.

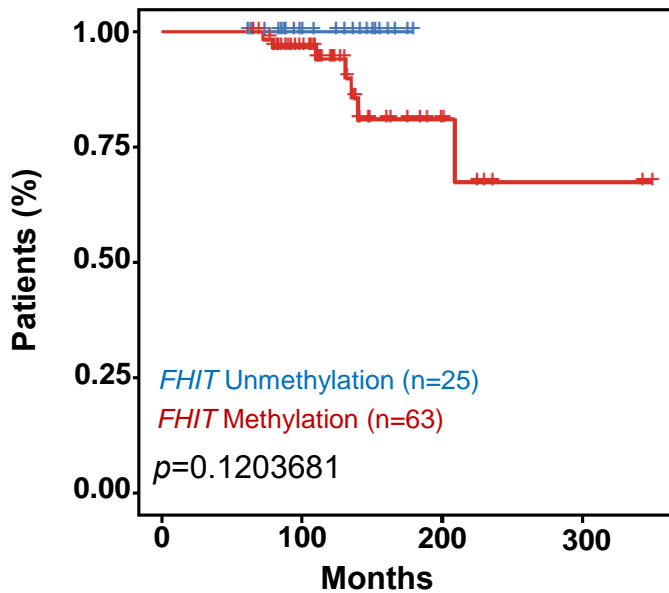

Supplement: jcm-09-01338-s001.pdf [file jcm-09-01338-s001.pdf]
